# Supplementary material
Source: PubMed Central journal article supplement (PMC5442521)
Supplement: JCM.02498-16_zjm999095494s1.pdf [file JCM.02498-16_zjm999095494s1.pdf]

**Supplementary table 1. Risk factor for LTBI among healthcare workers with concordant and discordant results between QFT and QFT-Plus**

| QFT      | QFT-Plus |          | Number | No. of risk factor (%) |            |            |
|----------|----------|----------|--------|------------------------|------------|------------|
|          | TB1      | TB2      |        | 0                      | ≥1         | Not known  |
| Positive | Positive | Positive | 23     | 7 (30.4)               | 15 (65.2)  | 1 (4.3)    |
|          | Positive | Negative | 2      | 1 (50.0)               | 0 (0.0)    | 1 (50.0)   |
|          | Negative | Positive | 6      | 2 (33.3)               | 4 (66.7)   | 0 (0.0)    |
|          | Negative | Negative | 11     | 6 (54.5)               | 4 (36.4)   | 1(9.1)     |
| Negative | Positive | Positive | 6      | 3 (50.0)               | 2 (33.3)   | 1(16.7)    |
|          | Positive | Negative | 10     | 3 (30.0)               | 6 (60.0)   | 0 (0.0)    |
|          | Negative | Positive | 16     | 7 (43.8)               | 9 (56.3)   | 0 (0.0)    |
|          | Negative | Negative | 913    | 622 (68.1)             | 191 (20.9) | 100 (11.0) |

QFT, QuantiFERON-TB Gold; QFT-Plus, QuantiFERON-TB Gold-Plus.

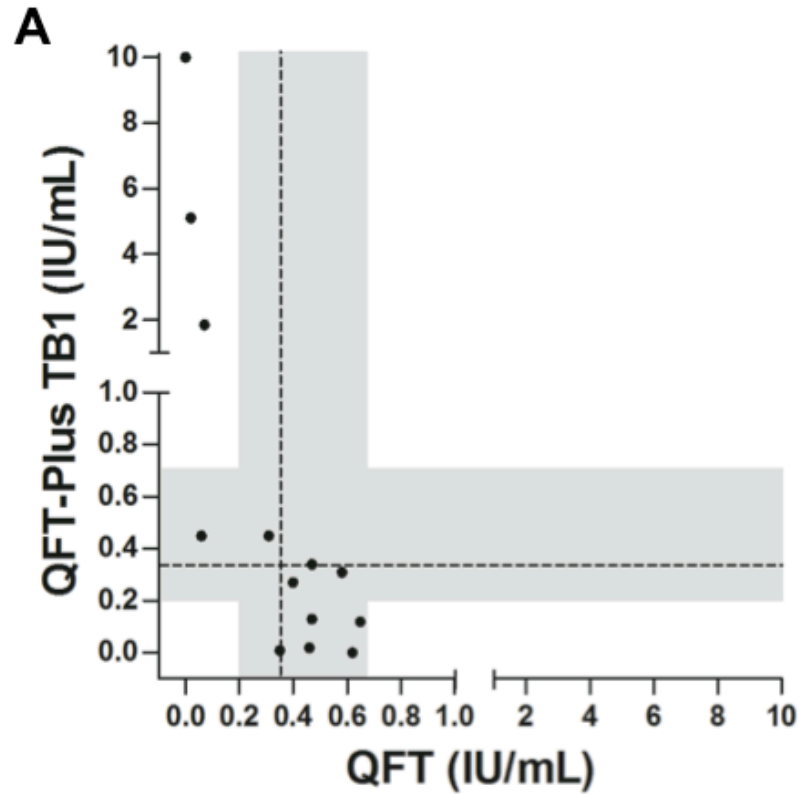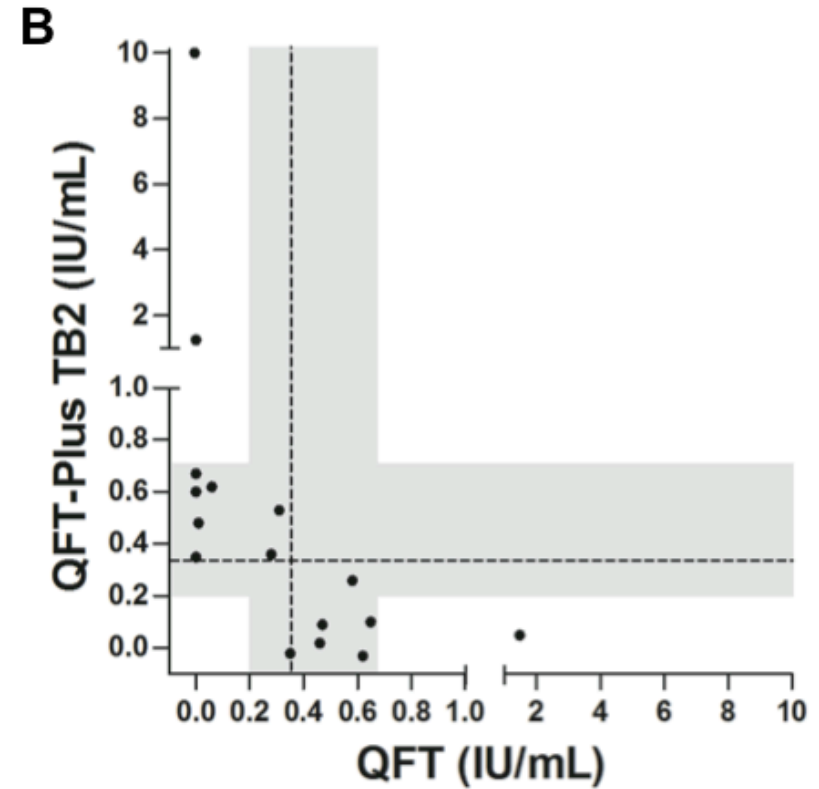

**Supplementary figure 1. Quantitative results in healthcare workers with discordant QFT and QFT-Plus results and no risk factors for LTBI.** Plots show quantitative results for QFT versus QFT-Plus TB1 (A) and QFT versus QFT-Plus TB2 (B) in 26 healthcare workers with no risk factors for LTBI. The dashed reference lines at 0.35 IU/mL are the assay cutoffs and the shaded areas mark the borderline range of 0.2–0.7 IU/mL.

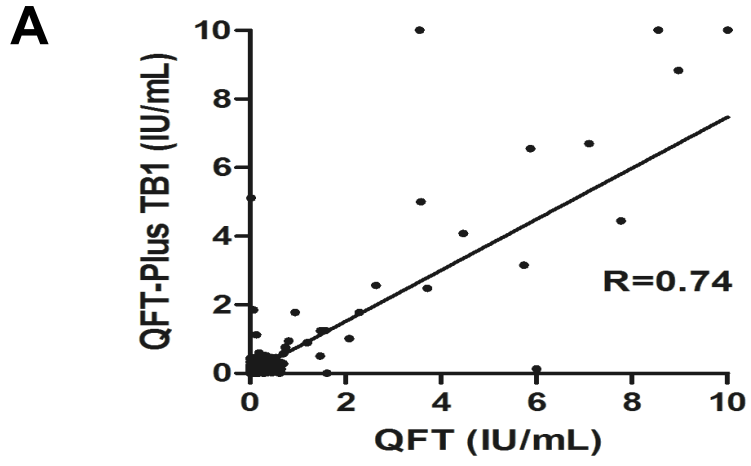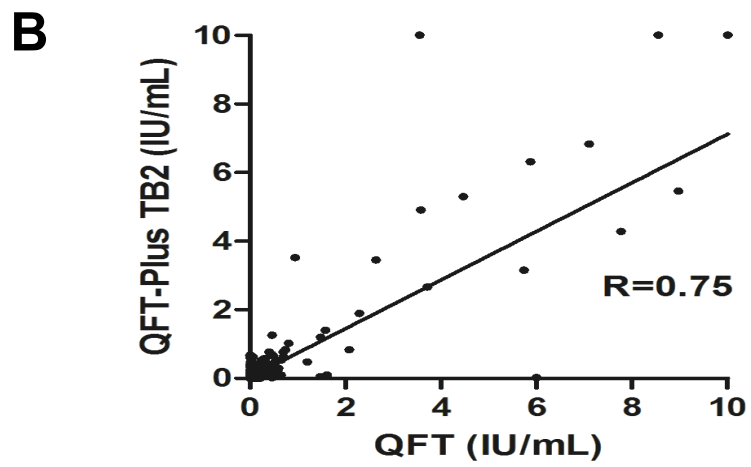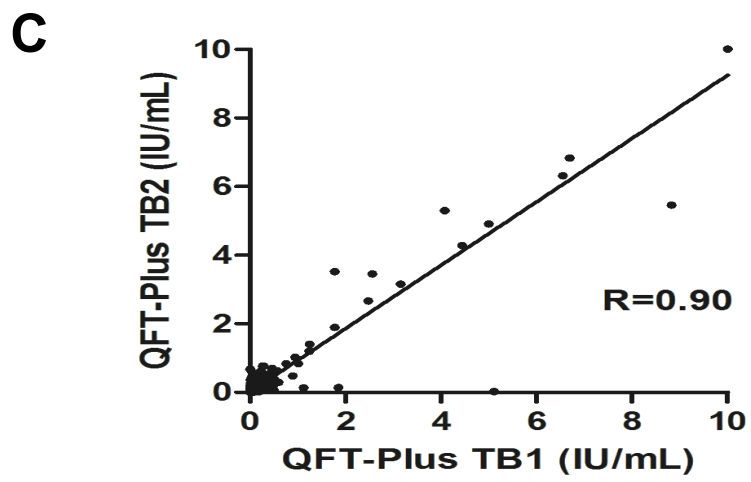

**Supplementary figure 2. Correlation between QFT and QFT-Plus results.** Plots show quantitative results for QFT versus QFT-Plus TB1 (A), QFT versus QFT-Plus TB2 (B) and QFT-Plus TB1 versus TB2 (C). R, Pearson's correlation coefficient.
